# Supplementary material
Source: Springer Nature journal article supplement (https://www.springermedizin.de/resource/supplementary/13052_2012_291_MOESM1_ESM.pdf/9671784)

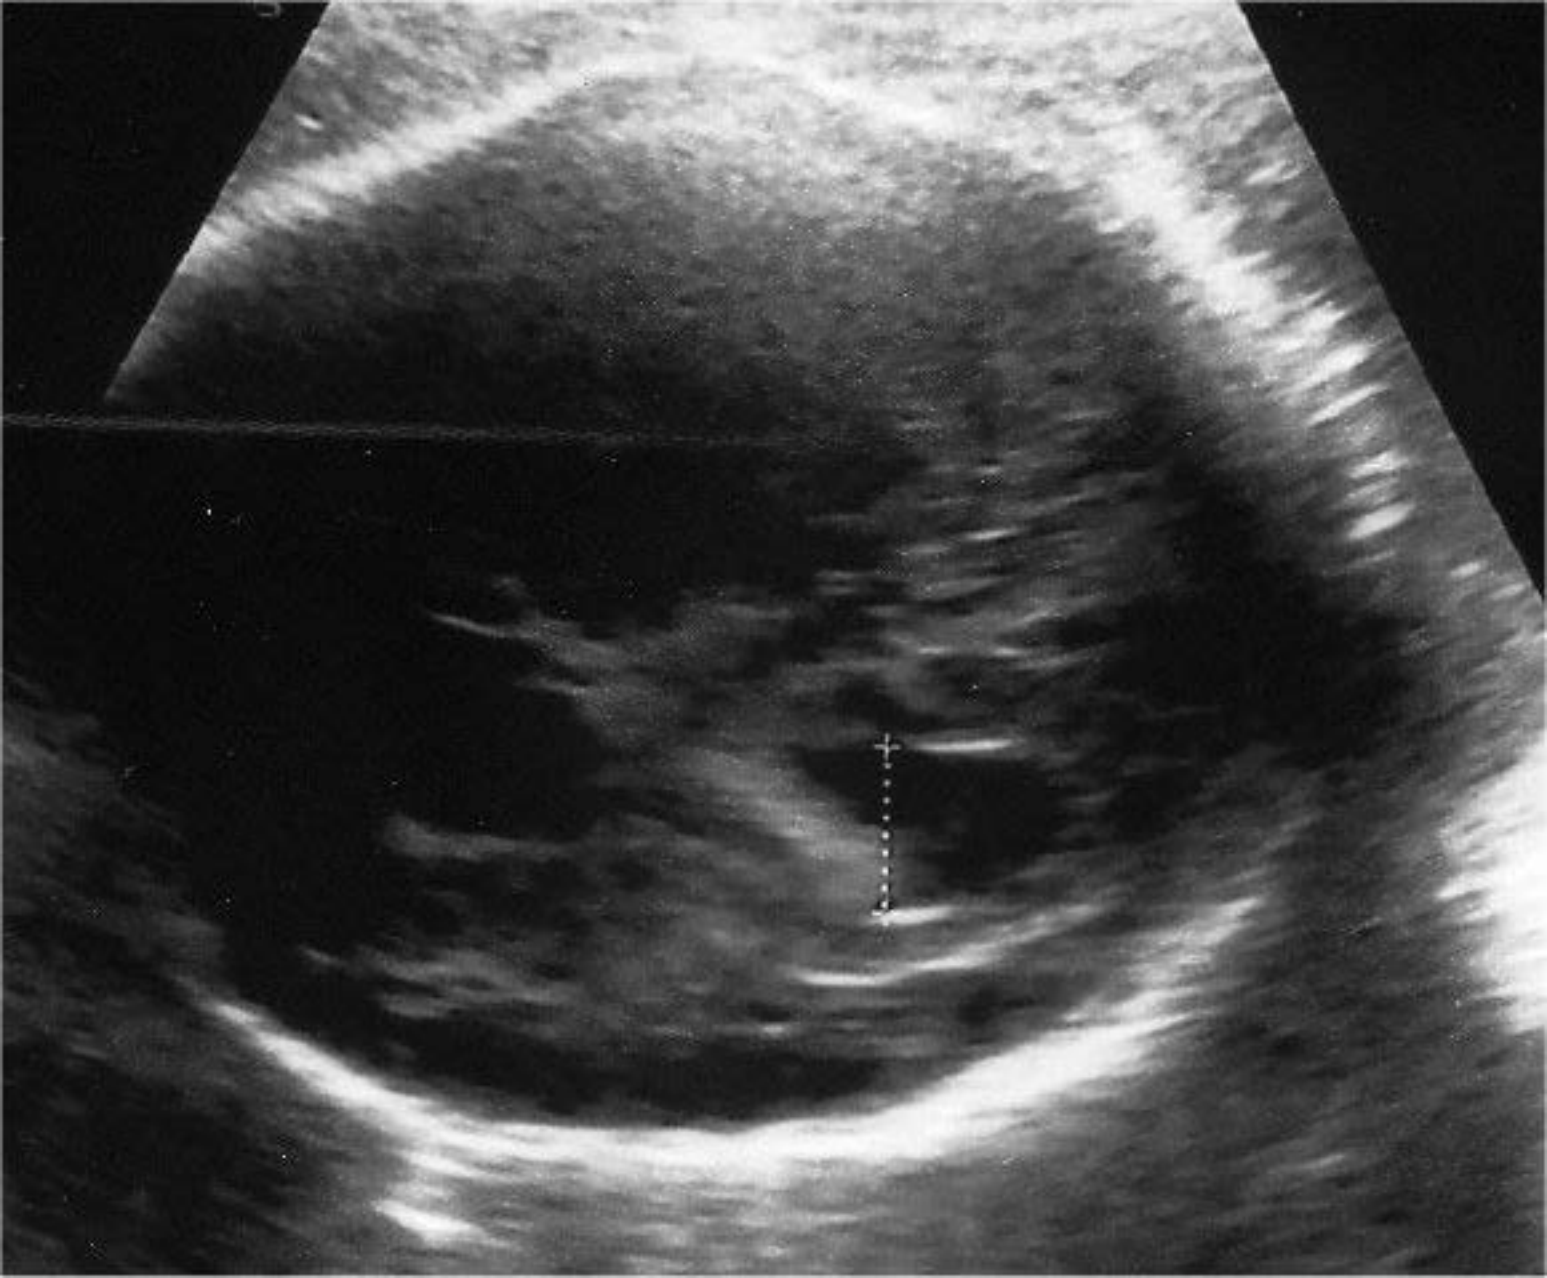

Supplement: MOESM1 [file 9671784]
